# Supplementary material
Source: PubMed Central journal article supplement (PMC5118104)
Supplement: NIHMS822981-supplement.pdf [file NIHMS822981-supplement.pdf]

## SUPPLEMENTAL FIGURE LEGEND

**Figure 1S.** Tumor growth ratio over a 14 day-period demonstrated marked suppression of tumor growth by  $^{188}\text{Re-MEM-238}$  (Group 1). However, the time course did not allow for differentiation between the non-specific control  $^{188}\text{Re-MOPC21}$  mAb (Group 2), unlabeled mAb (Group 3) and untreated tumors (Group 4).

**Figure 2S.** Whisker plot demonstrating 24-day Tumor Growth Ratios (TGR) as a function of treatment. The ranges for TGR of each treatment arm demonstrate minimal overlap between tumors treated with  $^{188}\text{Re-MEM-238}$  (Group 1) and those treated with  $^{188}\text{Re-MOPC21}$  (Group 2). Tumors treated with unlabeled MEM-234 (Group 3) and untreated tumors (Group 4) yield values that occupy similar ranges and do not overlap with  $^{188}\text{Re-MEM-238}$  (Group 1).

SUPPLEMENTAL FIGURES

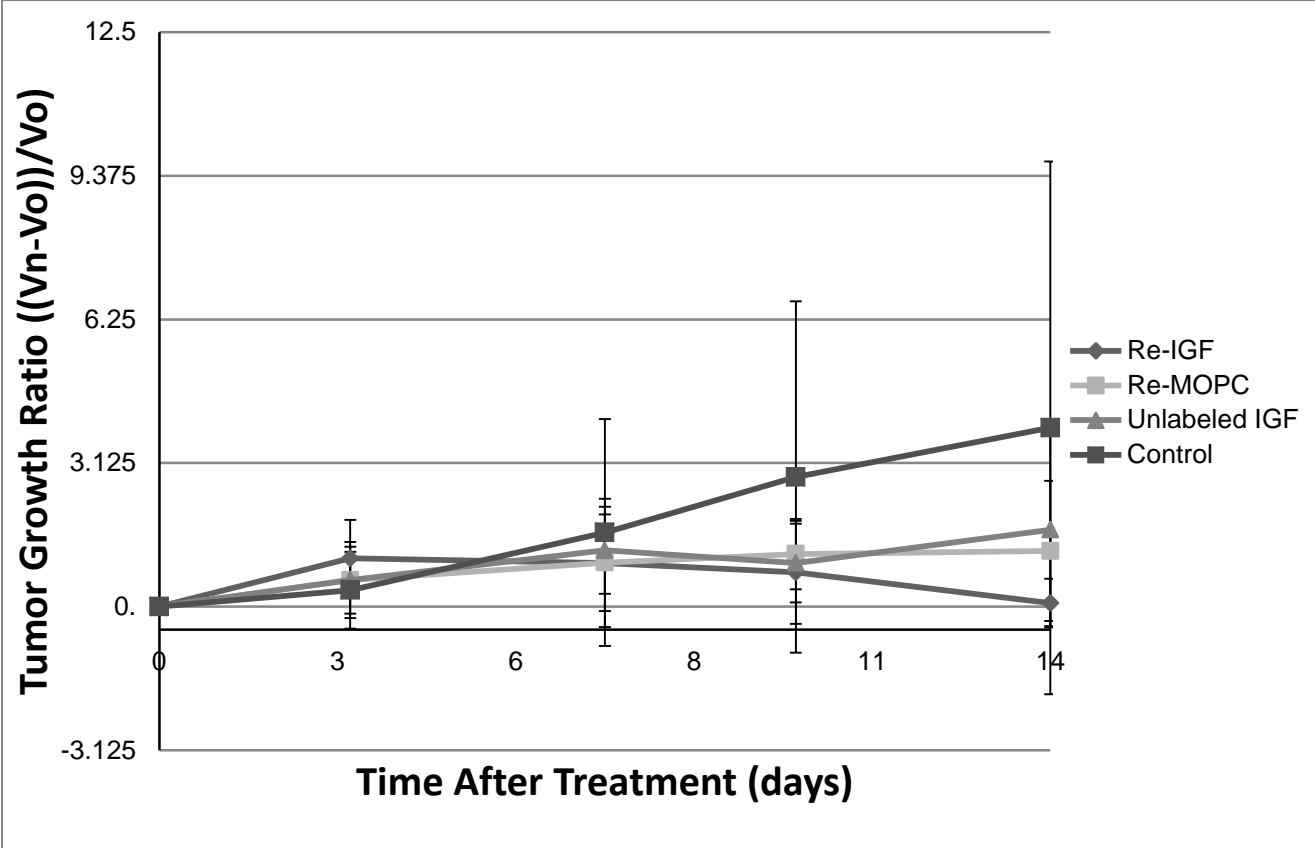

Figure 1S.

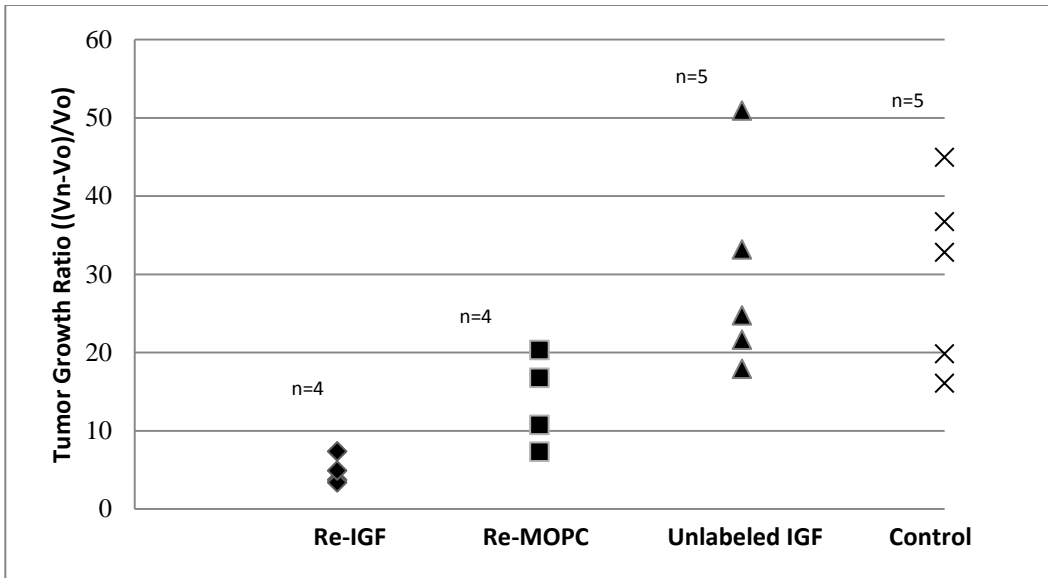

Figure 2S.
